# Supplementary material for: Design of 3-D europium(iii)–organic frameworks based on pyridine carboxylate N-oxide and acyclic binary carboxylate: syntheses, structures, and luminescence properties
Source: Royal Society of Chemistry journal article supplement (doi:10.1039/c0nj00373e), 2010-01-01
Supplement: c0nj00373e.pdf [file c0nj00373e.pdf]

# Design of 3-D europium(III)-organic frameworks based on pyridine carboxylate N-oxide and acyclic binary carboxylate: syntheses, structures, and luminescent properties

Lijuan Zhang, Donghua Xu, Yunshan Zhou\* and Fei Jiang

State Key Laboratory of Chemical Resource Engineering, Institute of Science, Beijing University of

Chemical Technology, Beijing 100029, P. R. China.

E-mail: zhouys@mail.buct.edu.cn

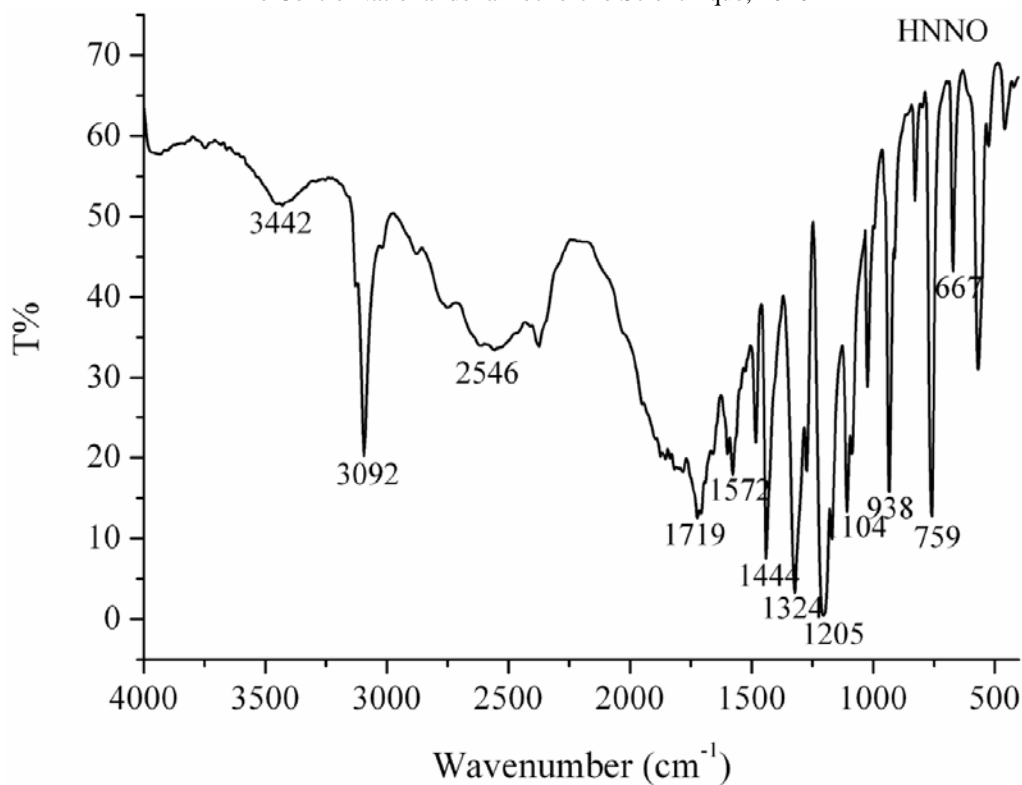

**Figure S1** The IR spectrum of HNNO.

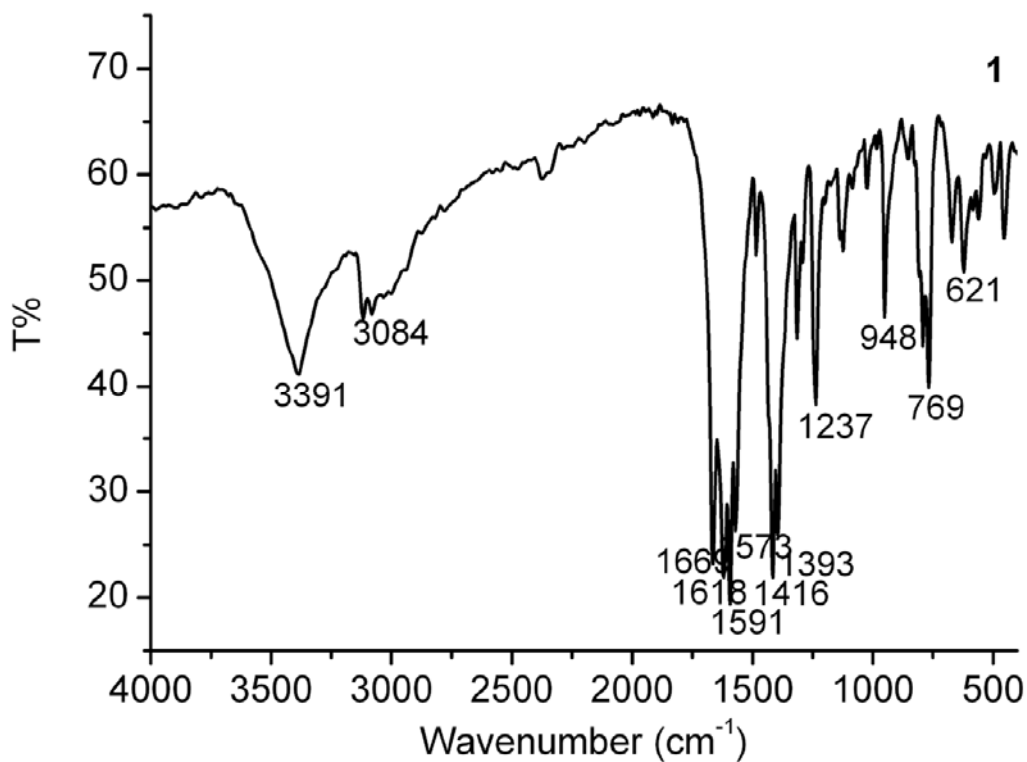

**Figure S2** The IR spectrum of 1.

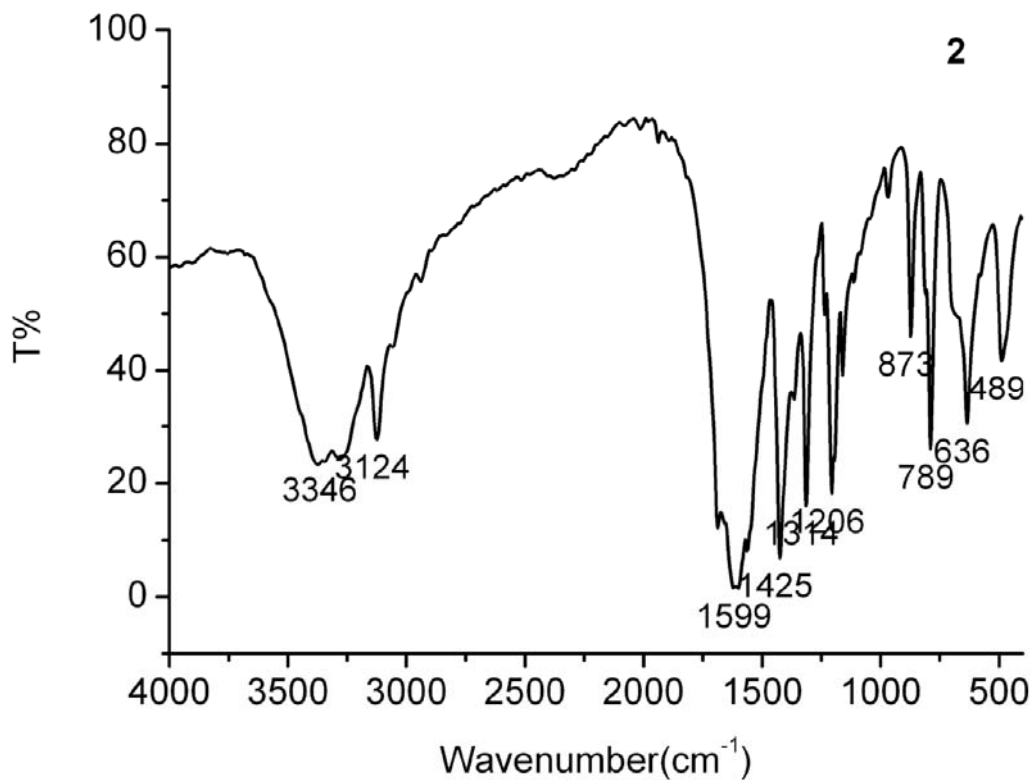

**Figure S3** The IR spectrum of 2.

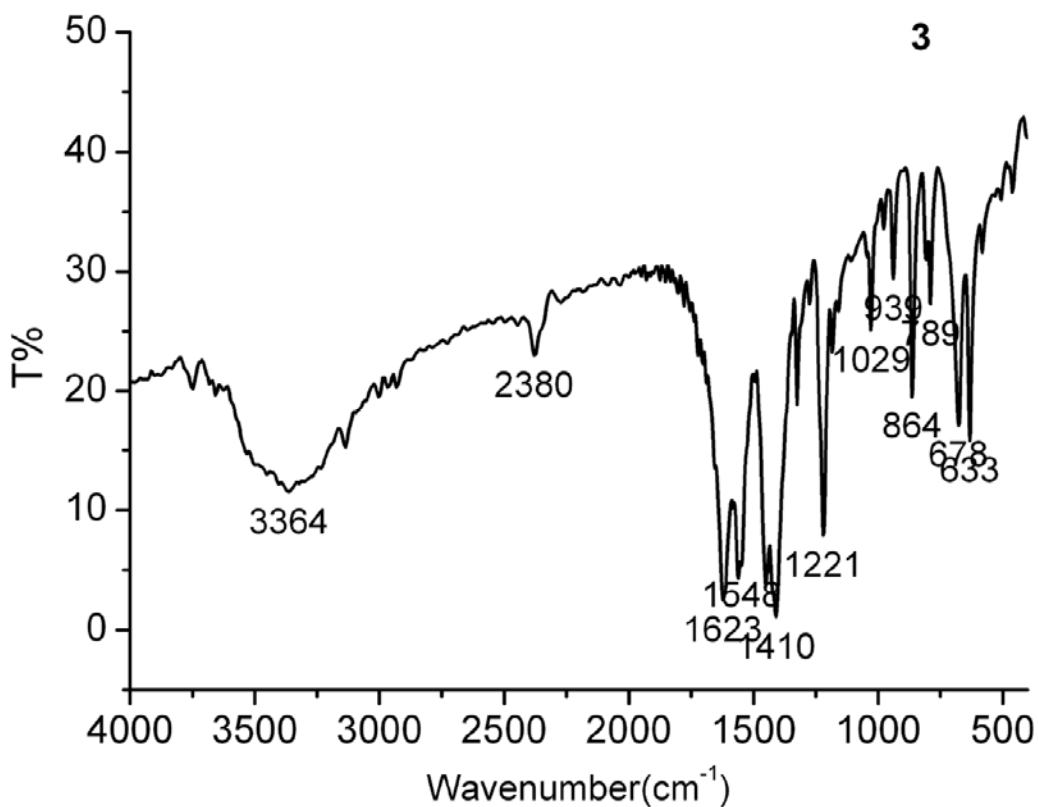

**Figure S4** The IR spectrum of 3.

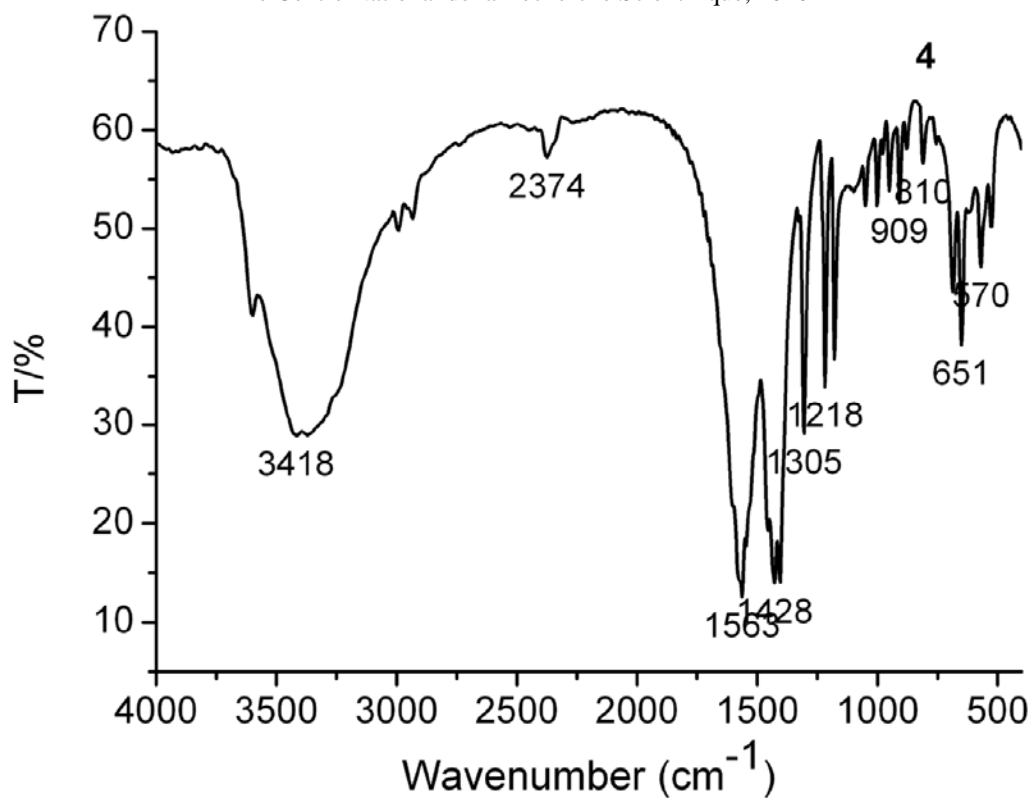

Figure S5 The IR spectrum of 4.

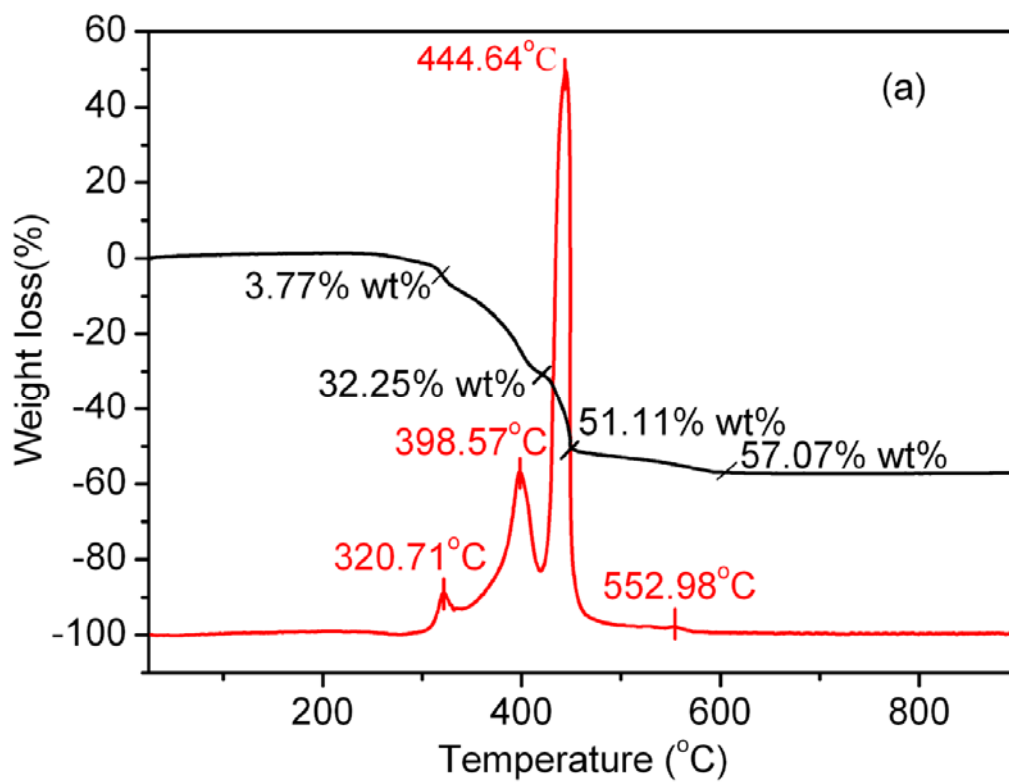

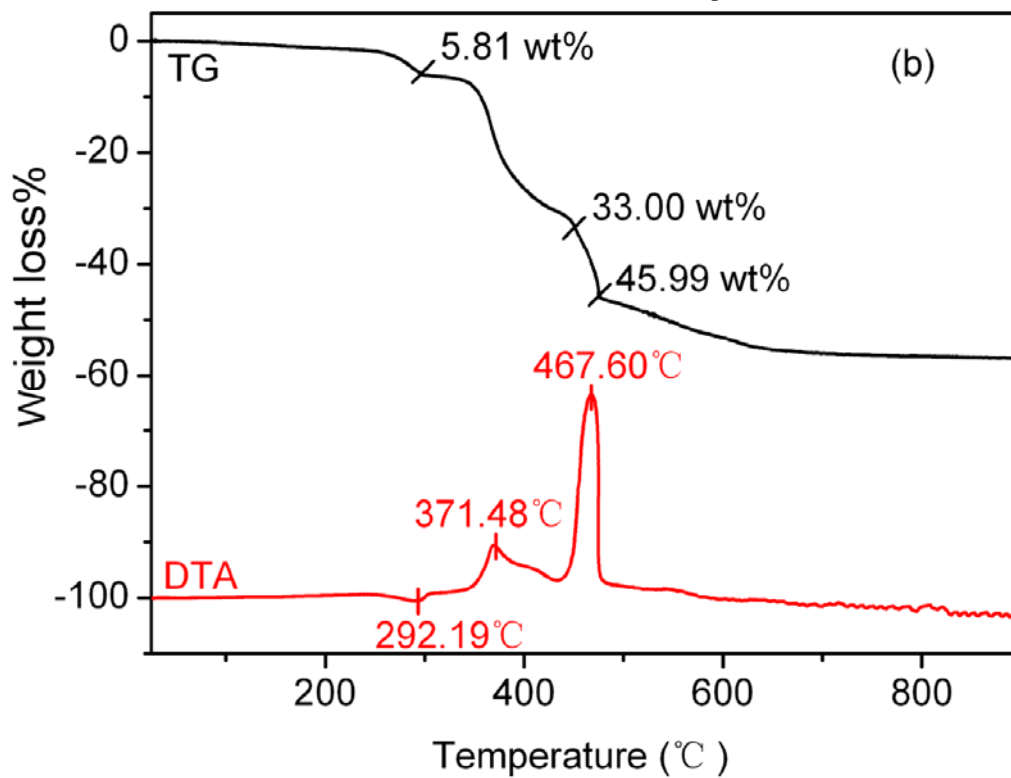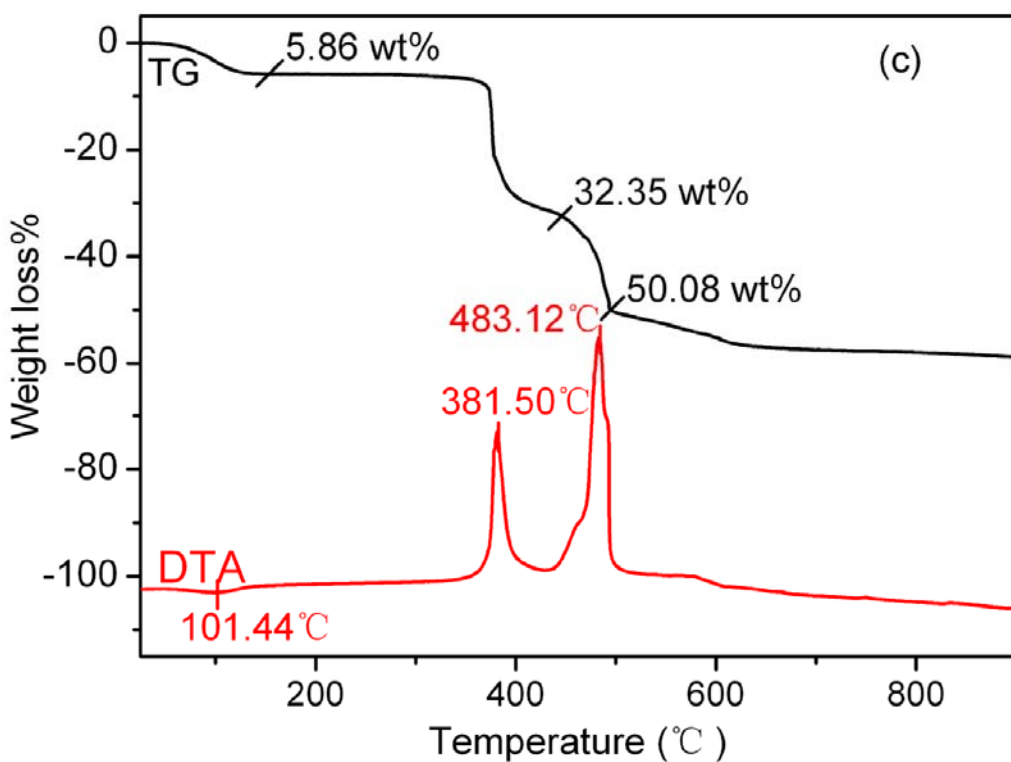

**Figure S6** The TG and DTA curves for **1** (a), **2** (b) and **3** (c)

**Table S1** Selected bond lengths(Å) and bond angles(°) for **1**, **2**, **3** and **4**.

---

| <b>1</b>            |           |                   |           |
|---------------------|-----------|-------------------|-----------|
| Eu(1)-O(2)          | 2.416(2)  | Eu(1)-O(7)        | 2.447(2)  |
| Eu(1)-O(4)          | 2.389(2)  | Eu(1)-O(9)        | 2.448(2)  |
| Eu(1)-O(6)#3        | 2.409(2)  | Eu(1)-O(5)#1      | 2.352(2)  |
| Eu(1)-O(1)#2        | 2.377(2)  | Eu(1)-O(8)#4      | 2.421(2)  |
| O(5)#1-Eu(1)-O(1)#2 | 85.25(7)  | O(2)-Eu(1)-O(8)#4 | 141.04(7) |
| O(5)#1-Eu(1)-O(4)   | 143.78(7) | O(5)#1-Eu(1)-O(7) | 85.59(7)  |
| O(1)#2-Eu(1)-O(4)   | 110.34(7) | O(1)#2-Eu(1)-O(7) | 69.68(7)  |
| O(5)#1-Eu(1)-O(6)#3 | 106.59(7) | O(4)-Eu(1)-O(7)   | 70.85(7)  |
| O(1)#2-Eu(1)-O(6)#3 | 147.43(7) | O(6)#3-Eu(1)-O(7) | 139.87(7) |
| O(4)-Eu(1)-O(6)#3   | 78.11(7)  | O(2)-Eu(1)-O(7)   | 117.79(7) |
| O(5)#1-Eu(1)-O(2)   | 142.76(7) | O(8)#4-Eu(1)-O(7) | 66.86(7)  |
| O(1)#2-Eu(1)-O(2)   | 77.57(7)  | O(5)#1-Eu(1)-O(9) | 71.51(8)  |
| O(4)-Eu(1)-O(2)     | 73.46(7)  | O(1)#2-Eu(1)-O(9) | 78.44(7)  |
| O(6)#3-Eu(1)-O(2)   | 74.97(7)  | O(4)-Eu(1)-O(9)   | 142.12(8) |
| O(5)#1-Eu(1)-O(8)#4 | 73.13(7)  | O(6)#3-Eu(1)-O(9) | 76.99(8)  |
| O(1)#2-Eu(1)-O(8)#4 | 132.41(7) | O(2)-Eu(1)-O(9)   | 72.79(8)  |
| O(4)-Eu(1)-O(8)#4   | 72.44(7)  | O(8)#4-Eu(1)-O(9) | 129.63(7) |
| O(6)#3-Eu(1)-O(8)#4 | 80.10(7)  | O(7)-Eu(1)-O(9)   | 142.08(8) |
| <b>2</b>            |           |                   |           |
| Eu(1)-O(2)#1        | 2.308(2)  | Eu(1)-O(1)        | 2.450(3)  |
| Eu(1)-O(5)#2        | 2.381(3)  | Eu(1)-O(7)#4      | 2.451(3)  |
| Eu(1)-O(3)#3        | 2.391(3)  | Eu(1)-O(4)        | 2.452(3)  |
| Eu(1)-O(6)          | 2.392(3)  | Eu(1)-O(8)        | 2.470(3)  |

|                     |           |                   |           |
|---------------------|-----------|-------------------|-----------|
| O(2)#1-Eu(1)-O(5)#2 | 92.98(9)  | O(1)-Eu(1)-O(7)#4 | 132.97(8) |
| O(2)#1-Eu(1)-O(3)#3 | 102.66(9) | O(2)#1-Eu(1)-O(4) | 78.26(9)  |
| O(5)#2-Eu(1)-O(3)#3 | 147.59(9) | O(5)#2-Eu(1)-O(4) | 67.02(9)  |
| O(2)#1-Eu(1)-O(6)   | 137.50(9) | O(3)#3-Eu(1)-O(4) | 143.66(9) |
| O(5)#2-Eu(1)-O(6)   | 109.25(8) | O(6)-Eu(1)-O(4)   | 78.03(9)  |
| O(3)#3-Eu(1)-O(6)   | 77.70(8)  | O(1)-Eu(1)-O(4)   | 119.80(8) |
| O(2)#1-Eu(1)-O(1)   | 148.66(9) | O(7)#4-Eu(1)-O(4) | 76.71(8)  |
| O(5)#2-Eu(1)-O(1)   | 74.03(9)  | O(2)#1-Eu(1)-O(8) | 74.61(9)  |
| O(3)#3-Eu(1)-O(1)   | 78.08(9)  | O(5)#2-Eu(1)-O(8) | 79.00(9)  |
| O(6)-Eu(1)-O(1)     | 73.70(8)  | O(3)#3-Eu(1)-O(8) | 78.10(9)  |
| O(2)#1-Eu(1)-O(7)#4 | 73.31(9)  | O(6)-Eu(1)-O(8)   | 143.56(9) |
| O(5)#2-Eu(1)-O(7)#4 | 143.22(9) | O(1)-Eu(1)-O(8)   | 74.95(9)  |
| O(3)#3-Eu(1)-O(7)#4 | 69.11(9)  | O(7)#4-Eu(1)-O(8) | 126.82(9) |
| O(6)-Eu(1)-O(7)#4   | 67.21(8)  | O(4)-Eu(1)-O(8)   | 134.83(9) |

3

|                     |            |                     |            |
|---------------------|------------|---------------------|------------|
| Eu(1)-O(7)#1        | 2.351(3)   | Eu(1)-O(1)#4        | 2.460(3)   |
| Eu(1)-O(3)#2        | 2.394(3)   | Eu(1)-O(4)          | 2.489(3)   |
| Eu(1)-O(2)          | 2.395(3)   | Eu(1)-O(6)#5        | 2.506(3)   |
| Eu(1)-O(5)          | 2.430(3)   | Eu(1)-O(7)#5        | 2.578(3)   |
| Eu(1)-O(1)#3        | 2.444(3)   |                     |            |
| O(7)#1-Eu(1)-O(3)#2 | 73.53(9)   | O(5)-Eu(1)-O(4)     | 53.22(9)   |
| O(7)#1-Eu(1)-O(2)   | 75.89(9)   | O(1)#3-Eu(1)-O(4)   | 73.39(9)   |
| O(3)#2-Eu(1)-O(2)   | 136.97(9)  | O(1)#4-Eu(1)-O(4)   | 101.99(9)  |
| O(7)#1-Eu(1)-O(5)   | 82.06(9)   | O(7)#1-Eu(1)-O(6)#5 | 122.93(9)  |
| O(3)#2-Eu(1)-O(5)   | 77.13(10)  | O(3)#2-Eu(1)-O(6)#5 | 87.25(10)  |
| O(2)-Eu(1)-O(5)     | 127.33(10) | O(2)-Eu(1)-O(6)#5   | 84.65(10)  |
| O(7)#1-Eu(1)-O(1)#3 | 147.45(9)  | O(5)-Eu(1)-O(6)#5   | 145.51(10) |

|                     |            |                     |           |
|---------------------|------------|---------------------|-----------|
| O(3)#2-Eu(1)-O(1)#3 | 138.66(9)  | O(1)#3-Eu(1)-O(6)#5 | 73.14(9)  |
| O(2)-Eu(1)-O(1)#3   | 78.11(9)   | O(1)#4-Eu(1)-O(6)#5 | 73.83(10) |
| O(5)-Eu(1)-O(1)#3   | 98.75(9)   | O(4)-Eu(1)-O(6)#5   | 144.20(9) |
| O(7)#1-Eu(1)-O(1)#4 | 144.04(9)  | O(7)#1-Eu(1)-O(7)#5 | 71.97(10) |
| O(3)#2-Eu(1)-O(1)#4 | 76.16(9)   | O(3)#2-Eu(1)-O(7)#5 | 71.20(9)  |
| O(2)-Eu(1)-O(1)#4   | 140.00(9)  | O(2)-Eu(1)-O(7)#5   | 70.99(9)  |
| O(5)-Eu(1)-O(1)#4   | 72.66(9)   | O(5)-Eu(1)-O(7)#5   | 143.45(9) |
| O(1)#3-Eu(1)-O(1)#4 | 63.66(10)  | O(1)#3-Eu(1)-O(7)#5 | 117.02(9) |
| O(7)#1-Eu(1)-O(4)   | 81.69(9)   | O(1)#4-Eu(1)-O(7)#5 | 115.48(9) |
| O(3)#2-Eu(1)-O(4)   | 127.02(10) | O(4)-Eu(1)-O(7)#5   | 142.00(9) |
| O(2)-Eu(1)-O(4)     | 76.41(10)  | O(6)#5-Eu(1)-O(7)#5 | 50.96(9)  |

4

|                     |           |                   |           |
|---------------------|-----------|-------------------|-----------|
| Eu(1)-O(4)#1        | 2.324(2)  | Eu(1)-O(7)        | 2.476(2)  |
| Eu(1)-O(5)#2        | 2.413(2)  | Eu(1)-O(6)        | 2.488(2)  |
| Eu(1)-O(2)#2        | 2.430(2)  | Eu(1)-O(1)        | 2.508(2)  |
| Eu(1)-O(3)#3        | 2.446(2)  | Eu(1)-O(2)        | 2.516(2)  |
| Eu(1)-O(5)          | 2.469(2)  |                   |           |
| O(4)#1-Eu(1)-O(5)#2 | 76.19(9)  | O(3)#3-Eu(1)-O(6) | 103.20(9) |
| O(4)#1-Eu(1)-O(2)#2 | 76.45(8)  | O(5)-Eu(1)-O(6)   | 52.49(8)  |
| O(5)#2-Eu(1)-O(2)#2 | 68.98(8)  | O(7)-Eu(1)-O(6)   | 70.86(8)  |
| O(4)#1-Eu(1)-O(3)#3 | 143.64(8) | O(4)#1-Eu(1)-O(1) | 81.83(9)  |
| O(5)#2-Eu(1)-O(3)#3 | 74.03(8)  | O(5)#2-Eu(1)-O(1) | 70.48(8)  |
| O(2)#2-Eu(1)-O(3)#3 | 73.73(8)  | O(2)#2-Eu(1)-O(1) | 137.40(8) |
| O(4)#1-Eu(1)-O(5)   | 131.31(8) | O(3)#3-Eu(1)-O(1) | 106.92(8) |
| O(5)#2-Eu(1)-O(5)   | 151.85(3) | O(5)-Eu(1)-O(1)   | 114.15(8) |
| O(2)#2-Eu(1)-O(5)   | 107.71(8) | O(7)-Eu(1)-O(1)   | 72.31(8)  |
| O(3)#3-Eu(1)-O(5)   | 78.24(8)  | O(6)-Eu(1)-O(1)   | 143.14(8) |



## Supplementary Material (ESI) for New Journal of Chemistry

This journal is © The Royal Society of Chemistry and

The Centre National de la Recherche Scientifique, 2010

|                   |           |                   |           |
|-------------------|-----------|-------------------|-----------|
| O(4)#1-Eu(1)-O(7) | 73.32(9)  | O(4)#1-Eu(1)-O(2) | 128.20(8) |
| O(5)#2-Eu(1)-O(7) | 134.41(8) | O(5)#2-Eu(1)-O(2) | 102.82(8) |
| O(2)#2-Eu(1)-O(7) | 132.59(8) | O(2)#2-Eu(1)-O(2) | 152.74(2) |
| O(3)#3-Eu(1)-O(7) | 143.03(8) | O(3)#3-Eu(1)-O(2) | 79.02(8)  |
| O(5)-Eu(1)-O(7)   | 69.41(8)  | O(5)-Eu(1)-O(2)   | 66.75(8)  |
| O(4)#1-Eu(1)-O(6) | 86.42(9)  | O(7)-Eu(1)-O(2)   | 72.22(8)  |
| O(5)#2-Eu(1)-O(6) | 139.60(8) | O(6)-Eu(1)-O(2)   | 116.40(8) |
| O(2)#2-Eu(1)-O(6) | 71.62(8)  | O(1)-Eu(1)-O(2)   | 51.40(7)  |

Symmetry transformations used to generate equivalent atoms. For **1** #1  $x, y+1, z$ ; #2  $-x+1, -y+1, -z$ ; #3  $-x+1, -y+1, -z+1$ ; #4  $-x+2, -y+2, -z+1$ ; #5  $x, y-1, z$ ; For **2**: #1  $x-1, y, z-1$ ; #2  $-x, -y, -z-1$ ; #3  $-x+1, -y+1, -z+1$ ; #4  $-x+1, -y+1, -z$ ; For **3**: #1  $-x+1, -y+1, -z$ ; #2  $-x+1, -y, -z$ ; #3  $-x+1, -y, -z+1$ ; #4  $x-1, y, z-1$ ; #5  $x, y-1, z$ ; For **4**: #1  $-x+1/2, -y+1/2, -z+1$ ; #2  $-x+1/2, y-1/2, -z+3/2$ ; #3  $x, -y+1, z+1/2$ .
